# Supplementary material for: Spatial and temporal transmission dynamics of respiratory syncytial virus in New Zealand before and after the COVID-19 pandemic
Source: PubMed Central journal article supplement (PMC11275701; doi:10.1101/2024.07.15.24310412), 2024-07-16

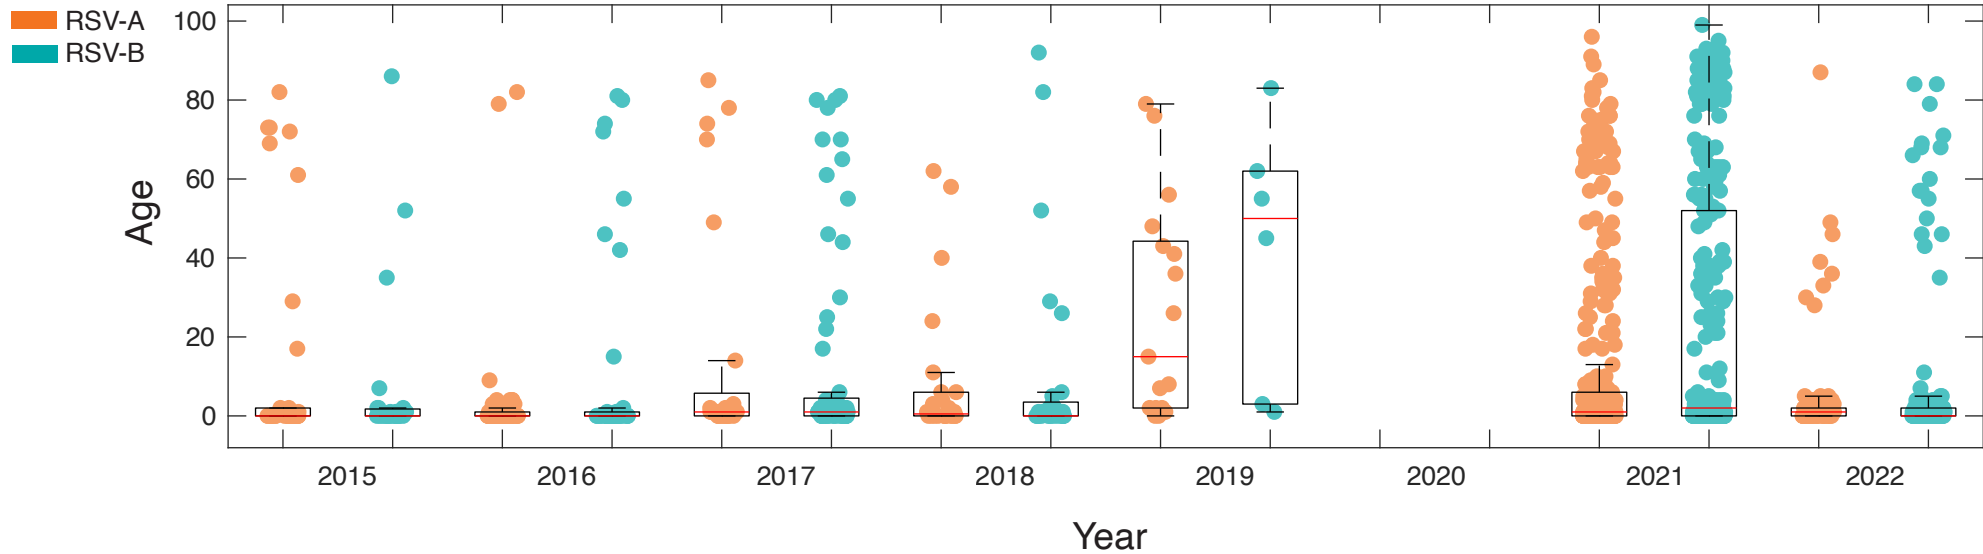

Supplement: media-4.pdf [file media-4.pdf]
